# Supplementary material for: Novel luminescent chiral network liquid-crystalline polymers containing Sm(iii) ions
Source: Royal Society of Chemistry journal article supplement (doi:10.1039/c6ra07388c), 2016-01-01
Supplement: c6ra07388c1.pdf [file c6ra07388c1.pdf]

## Supporting Information

### Novel luminescent chiral network liquid-crystalline polymers containing Sm(III) ions

Bing Yao, Yuehua Cong, Baoyan Zhang\*, Zeqing Wang, Fei Chen, Cong Sun

$M_1$  was prepared according to previously reported synthesis method. Yield: 76%. IR (KBr):  $3070\text{ cm}^{-1}$  (=CH),  $2974, 2856\text{ cm}^{-1}$  ( $-\text{CH}_3, -\text{CH}_2-$ ),  $1706\text{ cm}^{-1}$  (C=O),  $1642\text{ cm}^{-1}$  (C=C),  $1604, 1498\text{ cm}^{-1}$  (Ar-),  $1274, 1172\text{ cm}^{-1}$  (C-O-C). Found: C, 81.18, H, 9.87%. Calc. for  $\text{C}_{37}\text{H}_{54}\text{O}_3$ : C, 81.27, H, 9.95%.  $^1\text{H NMR}$  (600 MHz,  $\text{CDCl}_3$ ,  $\delta$ ): 7.99–7.98 (d,  $J=9$  Hz, 2H, Ar-H), 6.92 (d,  $J=9$  Hz, 2H, Ar-H), 6.05 (m, 1H,  $\text{CH}_2=\text{CH}-$ ), 5.44–5.41 (t, 2H,  $\text{CH}_2=\text{CH}-$ ), 5.32–5.31 (m, 1H, =CH-in cholesteryl), 4.59–4.58 (d,  $J=4.8$  Hz, 2H,  $-\text{CH}_2\text{O}-$ ), 2.03–0.67 (m, 44H, cholesteryl-H).

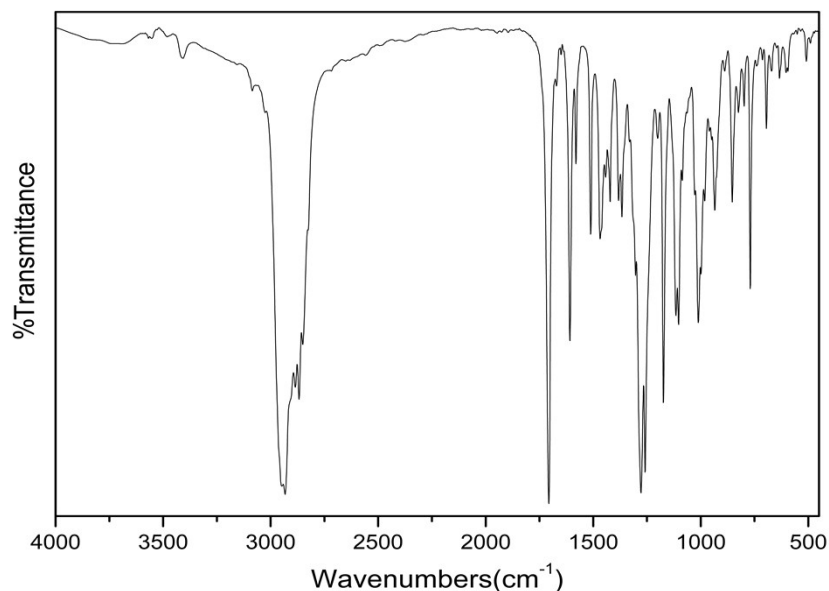

Figure S1. FT-IR spectrum of  $M_1$

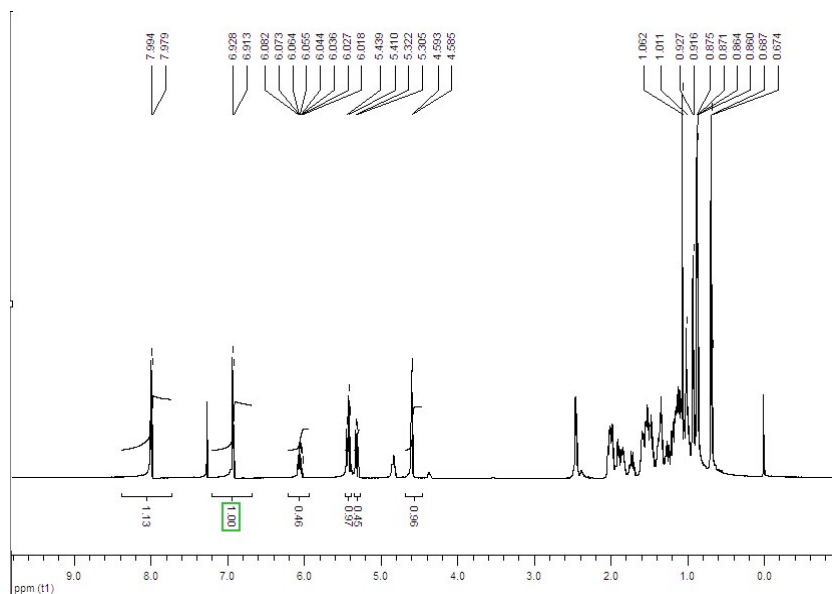

Figure S2.  $^1\text{H}$  NMR spectrum of  $\text{M}_1$  (600 MHz,  $\text{CDCl}_3$ ).

$\text{M}_2$  was prepared according to a previously reported synthetic method. Yield: 78%. IR (KBr): 3076(=CH), 2975–2851( $-\text{CH}_3$ ,  $-\text{CH}_2-$ ), 1758, 1717( $\text{C}=\text{O}$ ), 1642 ( $\text{C}=\text{C}$ ), 1603, 1502(Ar-). Anal. Calcd for  $\text{C}_{42}\text{H}_{54}\text{O}_{10}$ : C 70.17, H 7.57, O 22.26; Found: C 70.06, H 7.53, O 22.21.  $^1\text{H}$  NMR (600 MHz,  $\text{CDCl}_3$ ,  $\delta$ ): 8.18–7.15 (m, 8H, Ar-H), 5.86–5.78 (m, 2H,  $\text{CH}_2=\text{CH}-$ ), 5.06–4.92 (t, 4H,  $\text{CH}_2=\text{CH}-$ ), 4.67–4.04 (m, 8H, isosorbide), 2.61–2.55 (m, 4H,  $-\text{CH}_2\text{COO}-$ ), 2.07–2.02 (m, 4H,  $\text{CH}_2=\text{CHCH}_2(\text{CH}_2)_6\text{CH}_2\text{COO}-$ ), 1.77–1.33 (m, 24H,  $\text{CH}_2=\text{CHCH}_2(\text{CH}_2)_6\text{CH}_2\text{COO}-$ )

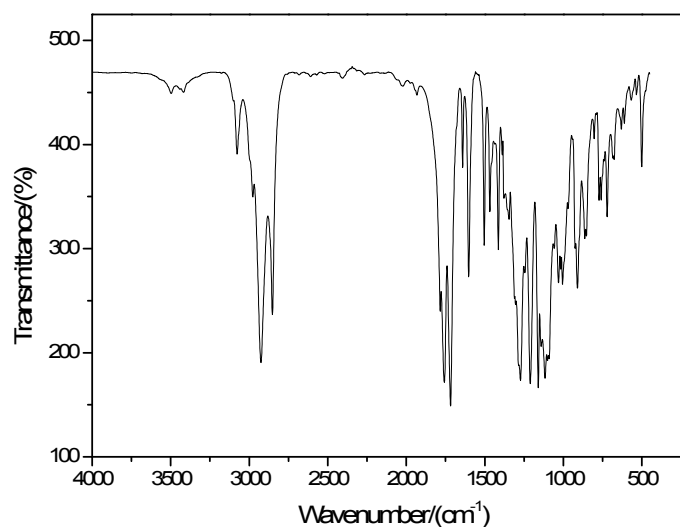

Figure S3. FT-IR spectrum of  $\text{M}_2$

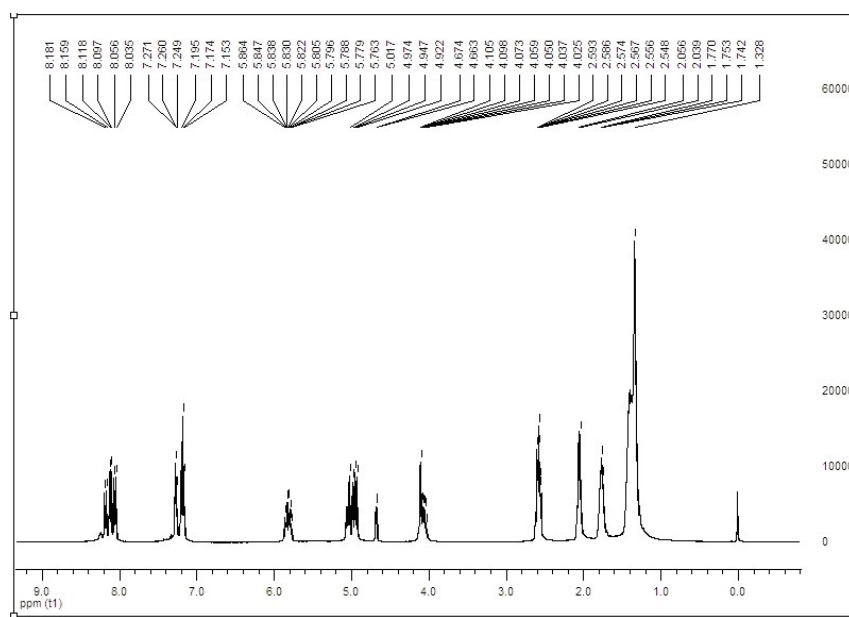

Figure S4.  $^1\text{H}$  NMR spectrum of  $\text{M}_2$  (600 MHz,  $\text{CDCl}_3$ )

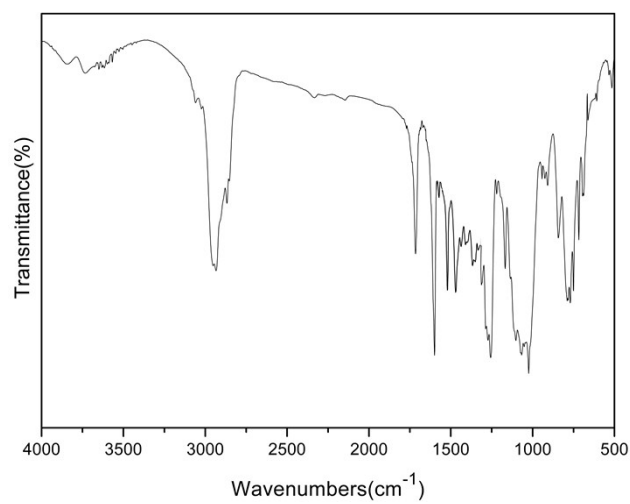

Figure S5. FT-IR spectrum of  $\text{M}_3$

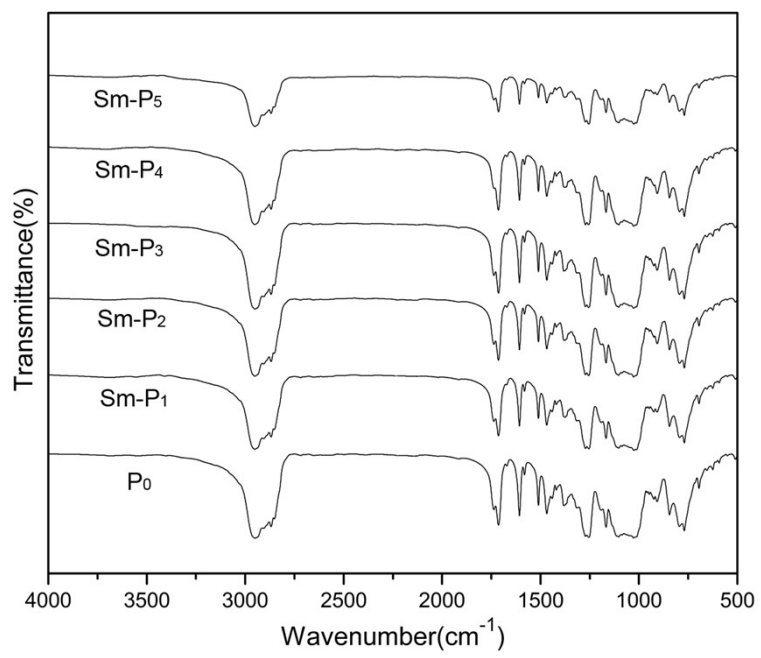

Figure S6. FT-IR spectra of P<sub>0</sub> and Sm-LCPs
